# Supplementary material
Source: publisher figshare collection journal article supplement (https://karger.figshare.com/ndownloader/files/14107856)
Supplement: Supplementary file 1 [file 14107856]

# Table e-3

# Dystonia Patient Demographics

| **Patient No.** |  | **Gender** |  | **Diagnosis** |  | **Age at Diagnosis**  **(years)** |  | **Age at surgery (years)** |  | **Procedure** |  | **Pre-op testing** |  | **Post-op testing**b |
| --- | --- | --- | --- | --- | --- | --- | --- | --- | --- | --- | --- | --- | --- | --- |
| DY1 |  | F |  | dystonia |  | 18 |  | 48 |  | Bilateral GPi |  | TWSTRS: 41.75 |  | TWSTRS: 38 |
| DY2 |  | M |  | dystonia |  | 12 |  | 33 |  | Bilateral GPi |  | FTMTRS: 62  BFMDRS-M: 22 |  | __ |
| DY3 |  | F |  | dystonia |  | birth |  | 28 |  | Bilateral GPi |  | BFMDRS-M: 94.5 |  | __ |
| DY4 |  | F |  | secondary dystonia due to cerebral palsy |  | birth |  | 8 |  | Bilateral GPi |  | BFMDRS-M: 85 |  | __ |
| DY5 |  | M |  | dystonia |  | 5 |  | 45 |  | Left VIM and Left GPi |  | FTMTRS: 23  BFMDRS-M: 20 |  | BFMDRS-M: 19.5 |
| DY6 |  | M |  | tardive dystonia |  | 46 |  | 60 |  | Bilateral GPi |  | BFMDRS-M: 1.5 |  | __ |
| DY7 |  | M |  | dystonia |  | 47 |  | 52 |  | Bilateral GPi |  | TWSTRS: 62.75  BFMDRS-M: 44 |  | TWSTRS: 48.75  BFMDRS-M: 8 |
| DY8 |  | F |  | dystonia |  | 19 |  | 48 |  | Bilateral GPi |  | FTMTRS: 45 |  | FTMTRS: 55 |
| DY9 |  | F |  | myoclonus dystonia |  | 11 |  | 52 |  | Bilateral GPi |  | TWSTRS: 26.25  BFMDRS-M: 8 |  | BFMDRS-M: 0 |
| DY10 |  | M |  | dystonia |  | birth |  | 13 |  | Bilateral GPi |  | __ |  | __ |
| DY11 |  | M |  | myoclonus dystonia |  | 2 |  | 12 |  | Bilateral GPi |  | TWSTRS: 17  BFMDRS-M: 43 |  | BFMDRS-M: 6 |
| DY12 |  | F |  | cervical dystonia |  | 41 |  | 60 |  | Bilateral GPi |  | TWSTRS: 42.75 |  | TWSTRS: 17 |
| DY13 |  | F |  | cervical dystonia |  | 36 |  | 50 |  | Bilateral GPi |  | __ |  | TWSTRS: 23 |
| DY14 |  | M |  | cervical and meige syndrome |  | 9 |  | 23 |  | Bilateral GPi |  | TWSTRS: 36 |  | TWSTRS: 4 |
| DY15 |  | M |  | Lubag |  | 37 |  | 39 |  | Bilateral GPi |  | UPDRS: 30 |  | UPDRS:34 |
| DY16 |  | F |  | SCA3 |  | 27 |  | 35 |  | Bilateral GPi |  | __ |  | __ |

Abbreviations: aAssessed at pre-operative evaluation; bPost-operative assessment performed at 6 months; BFMDRS-M: Burke Fahn Marsden Dystonia Rating Scale Motor portion; F: female; FTMTRS: Fahn Tolosa Marin Tremor Rating Scale; GPi: globus pallidus internus; M: male; SCA: spinocerebellar ataxia, TWSTRS: Toronto Western Spasmodic Torticollis Rating Scale, UPDRS: United Parkinson’s Disease Rating Scale; VIM: ventralis intermedious.
